# Supplementary material for: An amplified derepression controller with multisite inhibition and positive feedback
Source: PubMed Central journal article supplement (PMC7943023; doi:10.1371/journal.pone.0241654), 2021-03-09
Supplement: pone.0241654.s002.pdf [file pone.0241654.s002.pdf]

## S1 Text

# An amplified derepression controller with multisite inhibition and positive feedback

G. Drobac, Q. Waheed, B. Heidari, P. Ruoff\*  
Department of Chemistry, Bioscience, and Environmental Engineering,  
University of Stavanger, Norway

\*Corresponding author. Address: Department of Chemistry, Bioscience, and Environmental Engineering, University of Stavanger, Stavanger, Norway, Tel.: (47) 5183-1887, E-mail: peter.ruoff@uis.no

# Controller performance towards step-wise changes in $k_1$ and linearly increasing $k_1$ values

As shown in the schematic diagram by Fig 7 and Eqs 11 and 12 in the main text, a positive feedback can be implemented by first-order or second-order autocatalysis in C, which increase controller performance in terms of its life-time.

Here, results with step-wise changes and with linear increase in  $k_1$  are shown when C is produced by first-order and second-order autocatalysis.

## First-order autocatalysis in C

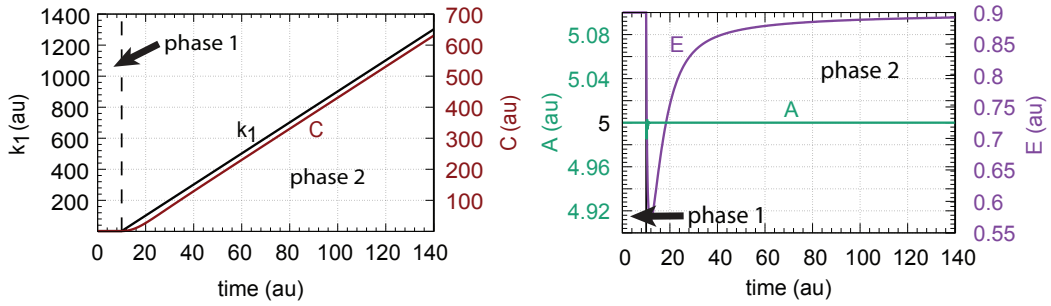

Figure S1: Controller performance with first-order autocatalysis in C (Eq. 11 in the main text) and linear increase of  $k_1$  ( $\dot{k}_1=10.0$ ). Phase 1: the controller is at steady state at its set-point  $A_{set}=5.0$  with constant  $k_1=2.0$ . Initial concentrations:  $A_0=5.0$ ,  $E_0=0.9$ ,  $C_0=1.0$ . Phase 2:  $k_1$  increases linearly,  $k_2=1 \times 10^5$ ,  $k_3=5 \times 10^2$ ,  $k_4=1 \times 10^2$ ,  $k_5=10.0$ , and  $k_6=1.0$ .  $K_M=1 \times 10^{-6}$ ,  $K_I=0.1$ ,  $n = 4$  (Eq 6 in the main text). Left panel:  $k_1$  and C as a function of time; right panel: A and E as a function of time.

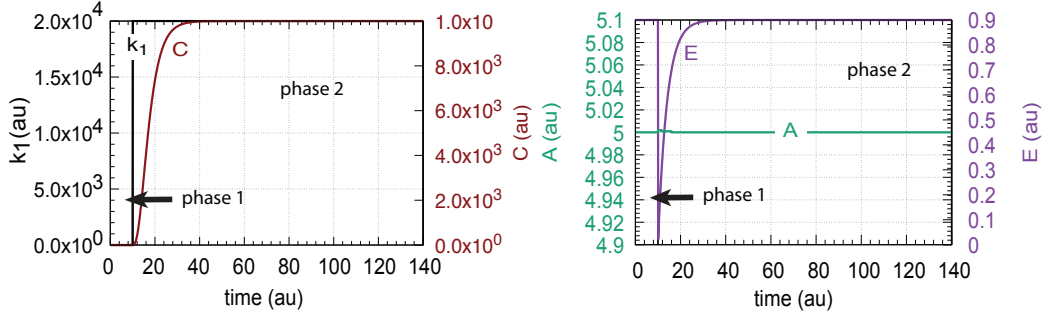

Figure S2: Controller performance with first-order autocatalysis in  $C$  (Eq. 11 in the main text) and step-wise increase of  $k_1$ . Phase 1: the controller is at steady state at its set-point  $A_{set}=5.0$  with constant  $k_1=2.0$ . Initial concentrations:  $A_0=5.0$ ,  $E_0=0.9$ ,  $C_0=1.0$ . Phase 2:  $k_1=2 \times 10^4$ ,  $k_2=1 \times 10^5$ ,  $k_3=5 \times 10^2$ ,  $k_4=1 \times 10^2$ ,  $k_5=10.0$ , and  $k_6=1.0$ .  $K_M=1 \times 10^{-6}$ ,  $K_I=0.1$ ,  $n = 4$  (Eq 6 in the main text). Left panel:  $k_1$  and  $C$  as a function of time; right panel:  $A$  and  $E$  as a function of time.

## Second-order autocatalysis in $C$

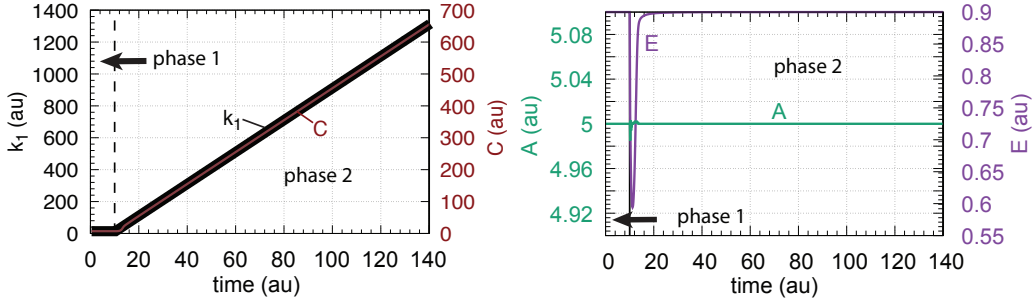

Figure S3: Controller performance with second-order autocatalysis in  $C$  (Eq. 12 in the main text) and linear increase of  $k_1$  ( $\dot{k}_1=10.0$ ). Phase 1: the controller is at steady state at its set-point  $A_{set}=5.0$  with constant  $k_1=2.0$ . Initial concentrations:  $A_0=5.0$ ,  $E_0=0.9$ ,  $C_0=1.0$ . Phase 2:  $k_1$  increases linearly,  $k_2=1 \times 10^5$ ,  $k_3=5 \times 10^2$ ,  $k_4=1 \times 10^2$ ,  $k_5=10.0$ , and  $k_6=1.0$ .  $K_M=1 \times 10^{-6}$ ,  $K_I=0.1$ ,  $n = 4$  (Eq 6 in the main text). Left panel:  $k_1$  and  $C$  as a function of time; right panel:  $A$  and  $E$  as a function of time.

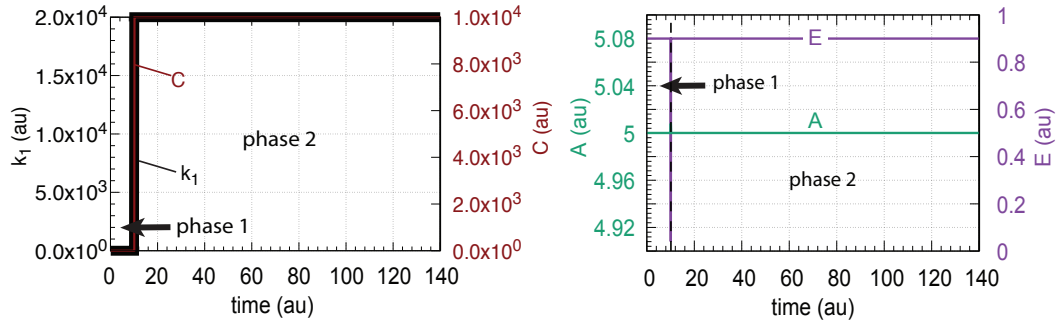

Figure S4: Controller performance with second-order autocatalysis in  $C$  (Eq. 12 in the main text) and step-wise increase of  $k_1$ . Phase 1: the controller is at steady state at its set-point  $A_{set}=5.0$  with constant  $k_1=2.0$ . Initial concentrations:  $A_0=5.0$ ,  $E_0=0.9$ ,  $C_0=1.0$ . Phase 2:  $k_1=2 \times 10^4$ ,  $k_2=1 \times 10^5$ ,  $k_3=5 \times 10^2$ ,  $k_4=1 \times 10^2$ ,  $k_5=10.0$ , and  $k_6=1.0$ .  $K_M=1 \times 10^{-6}$ ,  $K_I=0.1$ ,  $n = 4$  (Eq 6 in the main text). Left panel:  $k_1$  and  $C$  as a function of time; right panel:  $A$  and  $E$  as a function of time.
