# Supplementary material for: An amplified derepression controller with multisite inhibition and positive feedback
Source: PubMed Central journal article supplement (PMC7943023; doi:10.1371/journal.pone.0241654), 2021-03-09
Supplement: pone.0241654.s003.pdf [file pone.0241654.s003.pdf]

## S2 Text

# An amplified derepression controller with multisite inhibition and positive feedback

G. Drobac, Q. Waheed, B. Heidari, P. Ruoff\*

Department of Chemistry, Bioscience, and Environmental Engineering,  
University of Stavanger, Norway

\*Corresponding author. Address: Department of Chemistry, Bioscience, and Environmental Engineering, University of Stavanger, Stavanger, Norway, Tel.: (47) 5183-1887, E-mail: peter.ruoff@uis.no

# Hyperbolic growth by higher-order autocatalysis

We consider the following autocatalytic reaction with reaction order  $p > 1$ :

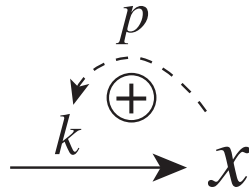

Figure S1: Scheme of an autocatalytic process in  $x$  with reaction order  $p > 1$ .

The rate equation of  $x$  is given by

$$\frac{dx}{dt} = k \cdot x^p; \quad p > 1 \quad (\text{S1})$$

By separating the variables

$$\frac{dx}{x^p} = k \cdot dt \implies x^{-p} dx = k \cdot dt \quad (\text{S2})$$

and integration we can get

$$\int_{x_0}^{x(t)} \frac{dx}{x^p} = \int_0^t k \cdot dt = k \cdot t \quad (\text{S3})$$

$$\frac{x^{1-p}}{1-p} - \frac{x_0^{1-p}}{1-p} = k \cdot t \quad (\text{S4})$$

with the following expression for  $x$

$$x(t) = \frac{x_0}{(1 - x_0^{p-1}(p-1)k \cdot t)^{\frac{1}{p-1}}} \quad (\text{S5})$$

Fig S2 shows  $x$  as a function of  $t$  when  $x_0=0.1$ ,  $p=2$ , and  $k=1.0$ .

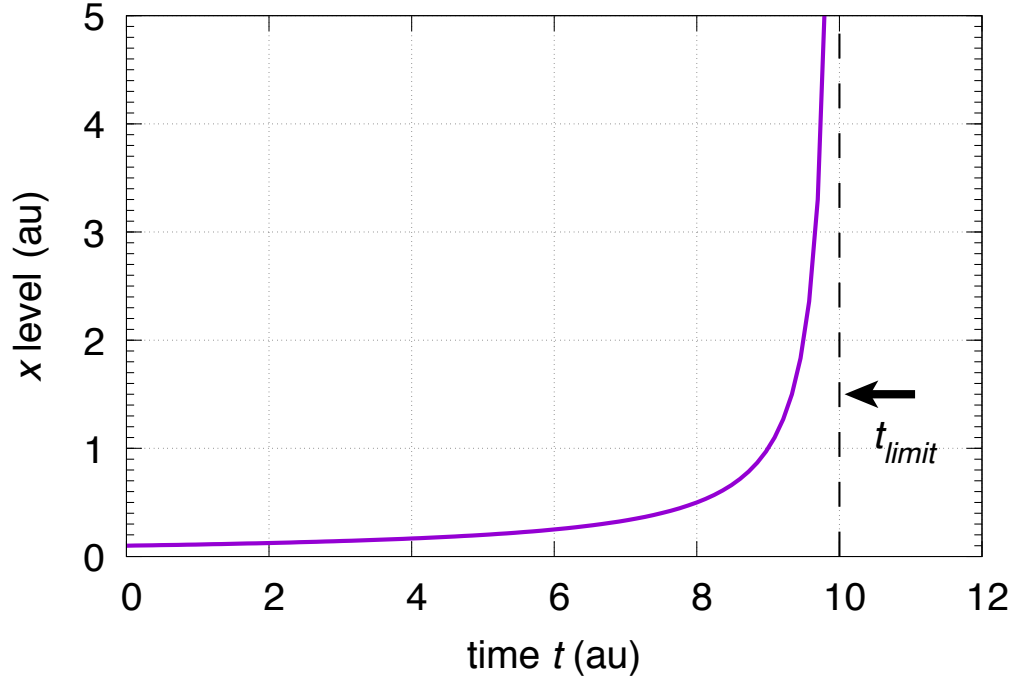

Figure S2: Hyperbolic growth of  $x$  when  $x_0=0.1$ ,  $p=2$ , and  $k=1.0$ .  $t_{limit}$  is the infinity limit, i.e. the time when  $x$  reaches infinity.

## Doubling time $\tau$ and infinity limit for hyperbolic growth

The doubling time  $\tau$  is the time needed to double the amount/concentration of  $x$ . For example, starting with  $x_0$  at a certain time  $t_0$   $\tau$  can be found by setting

$$x = 2x(t_0) = 2x_0 \quad (\text{S6})$$

Note that  $\tau$  is not a constant but a function of the starting  $x_0$  concentration, i.e.  $\tau = \tau(x_0)$ .

Using Eq S5 and the condition for  $\tau$  (Eq S6)

$$2x_0 = \frac{x_0}{(1 - x_0^{p-1}(p-1)k \cdot \tau(x_0))^{\frac{1}{p-1}}} \quad (\text{S7})$$

we get an expression for  $\tau(x_0)$  (also termed  $\tau_0$ )

$$\tau_0 = \tau(x_0) = \frac{2^{p-1} - 1}{2^{p-1}x_0^{p-1}(p-1)k} \quad (\text{S8})$$

or alternatively

$$\tau(2x_0) = \tau(x) = \frac{2^{p-1} - 1}{2^{p-1}x^{p-1}(p-1)k} \quad (\text{S9})$$

Observing that  $k$  and  $p$  are constants, we can simplify Eqs S8 and S9 to respectively

$$\tau_0 = \frac{K}{x_0^{p-1}} \quad \text{or} \quad \tau(x) = \frac{K}{x^{p-1}} \quad (\text{S10})$$

where  $K$  is a constant.

The infinity limit  $t_{limit}$  is calculated by adding successively all the doubling times  $\tau_0, \tau_1, \tau_2$ , etc., by starting with the initial concentration  $x_0$  (see Fig S3), i.e.

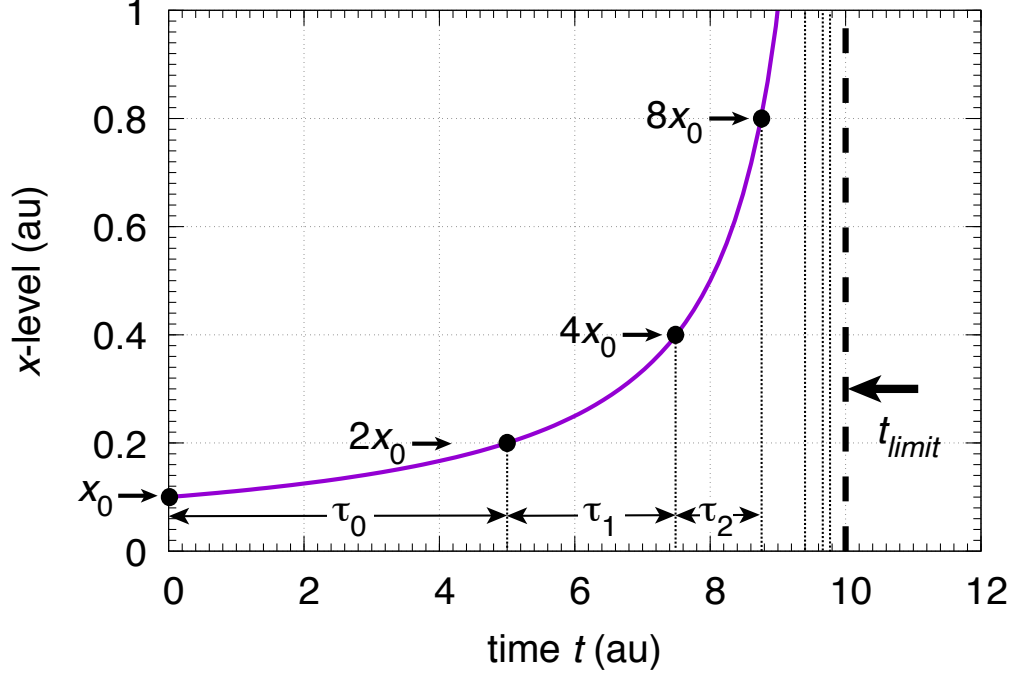

Figure S3:  $t_{limit}$  can be calculated by adding the doubling times  $\tau_0$ ,  $\tau_1$ ,  $\tau_2$ , etc. In this figure we start with  $x=x_0=0.1$ . Parameters  $k$  and  $p$  have the same values as in Fig S2.

$$t_{limit} = \tau_0 + \tau_1 + \tau_2 + \dots = \frac{K}{x_0^{p-1}} + \frac{K}{2x_0^{p-1}} + \frac{K}{4x_0^{p-1}} + \dots \quad (\text{S11})$$

$$t_{limit} = \frac{K}{x_0^{p-1}} \left( 1 + \frac{1}{2^{p-1}} + \frac{1}{2^{2(p-1)}} + \frac{1}{2^{3(p-1)}} + \dots \right) \quad (\text{S12})$$

$$= \tau_0 \left( 1 + \left(\frac{1}{2^{p-1}}\right)^1 + \left(\frac{1}{2^{p-1}}\right)^2 + \left(\frac{1}{2^{p-1}}\right)^3 + \dots \right) \quad (\text{S13})$$

$$= \tau_0 \sum_{n=0}^{n=\infty} a^n = \frac{\tau_0}{1-a} \quad \text{with} \quad a = \frac{1}{2^{p-1}} \quad (\text{S14})$$

Eq S14 converges only when  $a < 1$ , which is equivalent with the condition  $p > 1$ . Only then hyperbolic growth is observed.
