# Supplementary material for: An amplified derepression controller with multisite inhibition and positive feedback
Source: PubMed Central journal article supplement (PMC7943023; doi:10.1371/journal.pone.0241654), 2021-03-09
Supplement: pone.0241654.s006.pdf [file pone.0241654.s006.pdf]

# Review

## Major issues

- 1 (a) Line 58: Why the breakdown takes place when  $E = K_I$ ??

Okay, but I am still curious about why the controller breaks down when  $E/K_I \ll 1$ . I think the breakdown of the controller is actually up to the size of  $k_1(t)$ , not the value of  $E/K_I$  (of course when  $k_1$  is big,  $E$  is small. But what I mean is, the main reason of the breakdown is  $k_1$ , not  $E/K_I$  in the sense of math). Am I missing something? Also, I do not understand why  $E/K_I = 1$  is critical for the controller. How the value 1 came up with? Is it just because we regard that  $E/K_I \leq 1$  is small and  $E/K_I > 1$  is big? If so, I think this analysis is somewhat crude unless the authors provide more rigorous verification about why the controller becomes critical when  $E/K_I = 1$ .

- 1 (h) Line 296 and Eq (28): I think the derivative of  $C$  never converges to 0 as shown in Fig 21 c. I guess Eq (28) is actually derived by using the fact that  $\frac{1}{t}(\ln C(t) + constant) \rightarrow 0$  as  $t \rightarrow \infty$ . If so, the authors need to show this.

To me, it is not obvious how we can derive Eq 30 with  $\langle \dot{C} \rangle = 0$ . This condition ( $\langle \dot{C} \rangle = 0$ ) may not solely imply Eq 30. Suppose  $C(t) = e^{-t}$  for which  $\langle \dot{C} \rangle = 0$  when  $t \rightarrow \infty$ . Then

$$\frac{1}{t} \int_0^t \frac{\dot{C}(\tau)}{C(\tau)} d\tau = \frac{1}{t} \int_0^t \frac{K_I}{E + K_I} d\tau.$$

But, since

$$\frac{1}{t} \int_0^t \frac{\dot{C}(\tau)}{C(\tau)} d\tau = \frac{1}{t} (\ln C(t) - \ln C(0)) \rightarrow -1, \quad \text{as } t \rightarrow \infty.$$

Is  $C$  bounded away from  $c_0$  for some  $c_0 > 0$ ? (it is bounded above as shown in Figure 21) Then the limit  $\lim_{t \rightarrow \infty} \frac{1}{t} \int_0^t \frac{\dot{C}(\tau)}{C(\tau)} d\tau$  is zero obviously. I think the authors should provide a more rigorous explanation for this.

## Minor issues

- 11 Fig 17 (f) does not look like an exponential decrease. To show this clearly, the log-scale can be used.

If the y-axis in Figure 17 f is in log-scale, it should be indicated in the figure.
